# Supplementary material
Source: PubMed Central journal article supplement (PMC11653749)
Supplement: NIHMS2036960-supplement-Supplemental_Figure_1.pdf [file NIHMS2036960-supplement-Supplemental_Figure_1.pdf]

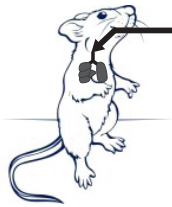

### Juvenile Balb/c Mice

#### Treatment Groups:

1. Saline
2. DEP 1.2mg/kg
3. DEP 6.0mg/kg
4. HDM 0.8mg/kg
5. DEP 6.0mg/kg + HDM 0.8mg/kg
6. DEP 1.2mg/kg + HDM 0.8mg/kg

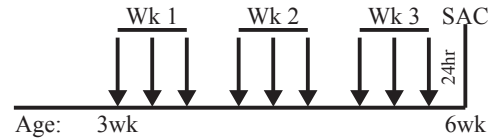

**Supplementary Figure 1. Exposure protocol.** 3-week-old wild-type Balb/c mice were exposed 9 times over 3 weeks to either saline, DEP at 1.2mg/kg, DEP at 6.0mg/kg, HDM at 0.8mg/kg, DEP 1.2mg/kg plus HDM, or DEP 6.0mg/kg plus HDM. Lung mechanic studies and tissues were harvested 24 hours after the last exposure.
