# Supplementary material
Source: PubMed Central journal article supplement (PMC11653749)
Supplement: NIHMS2036960-supplement-Supplemental_Figure_3.pdf [file NIHMS2036960-supplement-Supplemental_Figure_3.pdf]

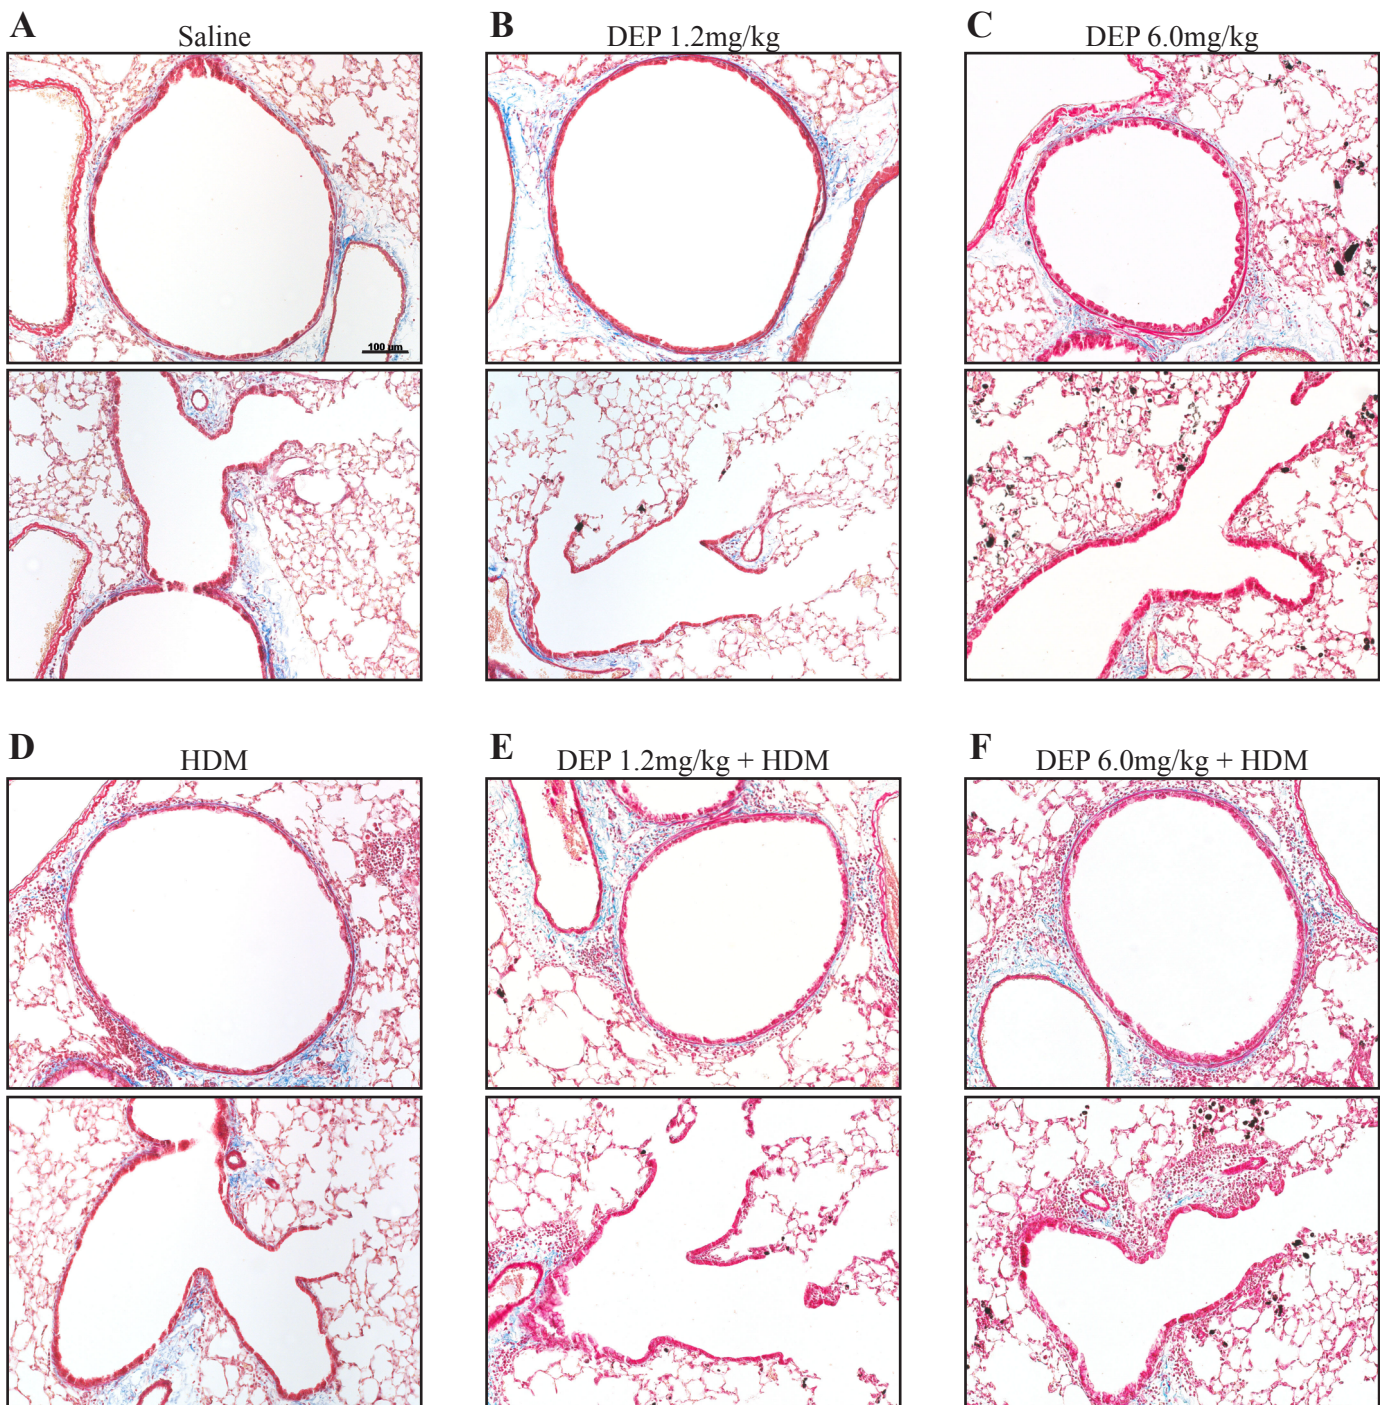

**Supplementary Figure 3. Masson's trichrome staining of lung sections following DEP and allergen exposure.** (A-F) Trichrome staining of lung sections with two images shown per group; upper image is large conducting airway and lower image shows medium sized airways and terminal bronchioles. All images were shot at the same magnification, scale bar in first panel is 100µm.
