# Supplementary material
Source: PubMed Central journal article supplement (PMC11653749)
Supplement: NIHMS2036960-supplement-Supplemental_Figure_6.pdf [file NIHMS2036960-supplement-Supplemental_Figure_6.pdf]

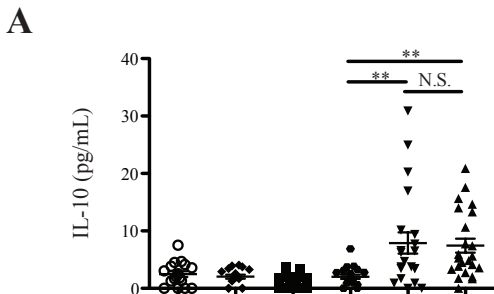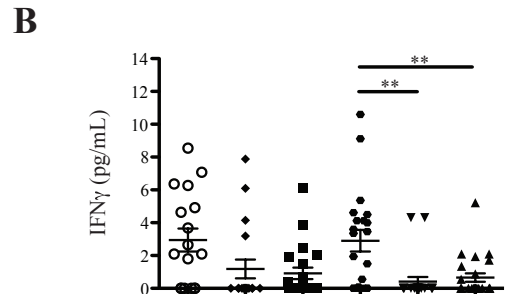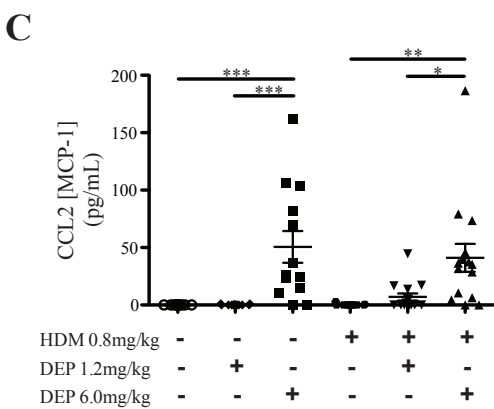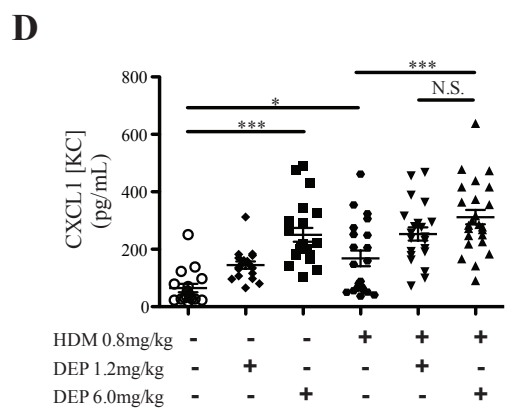

**Supplementary Figure 6. Cytokine and chemokine levels in BALF increased with DEP and HDM exposure.** Cytokine and chemokine levels in BALF were measured by ELISA (A-D). Statistical significance was determined to be  $p < 0.05$  (\*),  $p < 0.01$  (\*\*), and  $p < 0.001$  (\*\*\*) or not significant if  $p > 0.05$  (N.S.). Error bars shown represent the standard error of mean ( $\pm$ SEM). The number of animals per group was 15-25.
