# Supplementary material
Source: PubMed Central journal article supplement (PMC11653749)
Supplement: NIHMS2036960-supplement-Supplemental_Figure_7.pdf [file NIHMS2036960-supplement-Supplemental_Figure_7.pdf]

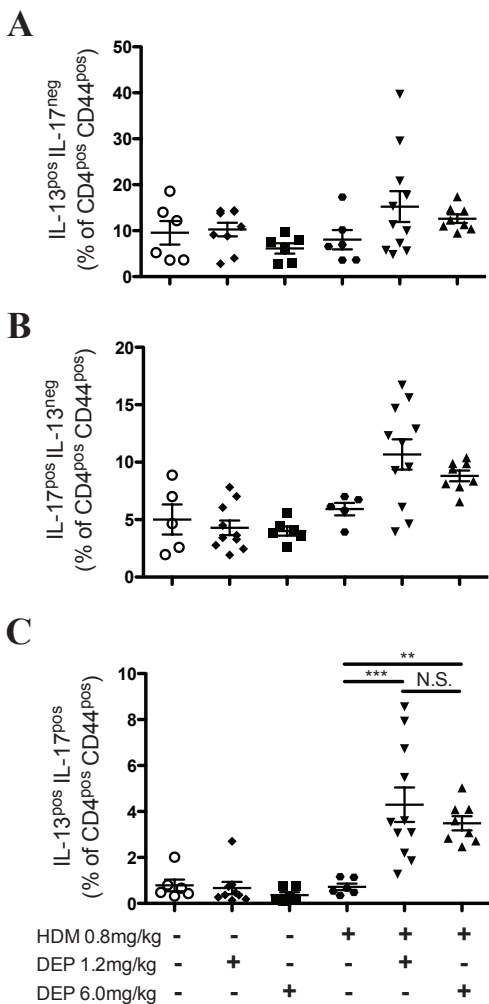

**Supplementary Figure 7. The percentage of dual positive effector T cells increases with DEP and HDM exposure.**

Intracellular cytokine staining, after ex vivo restimulation, of effector T cells (as a percentage of CD4<sup>pos</sup> CD44<sup>pos</sup> cells) that were positive for IL-13 (D), IL-17A (E), and double positive for IL-13 and IL-17A (F). Gating strategies are shown in Fig E8d. Statistical significance was determined to be  $p < 0.05$  (\*),  $p < 0.01$  (\*\*), and  $p < 0.001$  (\*\*\*) or not significant if  $p > 0.05$  (N.S.). Error bars shown represent the standard error of mean ( $\pm$ SEM). The number of animals per group was 6-11.
