# Supplementary material
Source: PubMed Central journal article supplement (PMC11653749)
Supplement: NIHMS2036960-supplement-Supplemental_Figure_8.pdf [file NIHMS2036960-supplement-Supplemental_Figure_8.pdf]

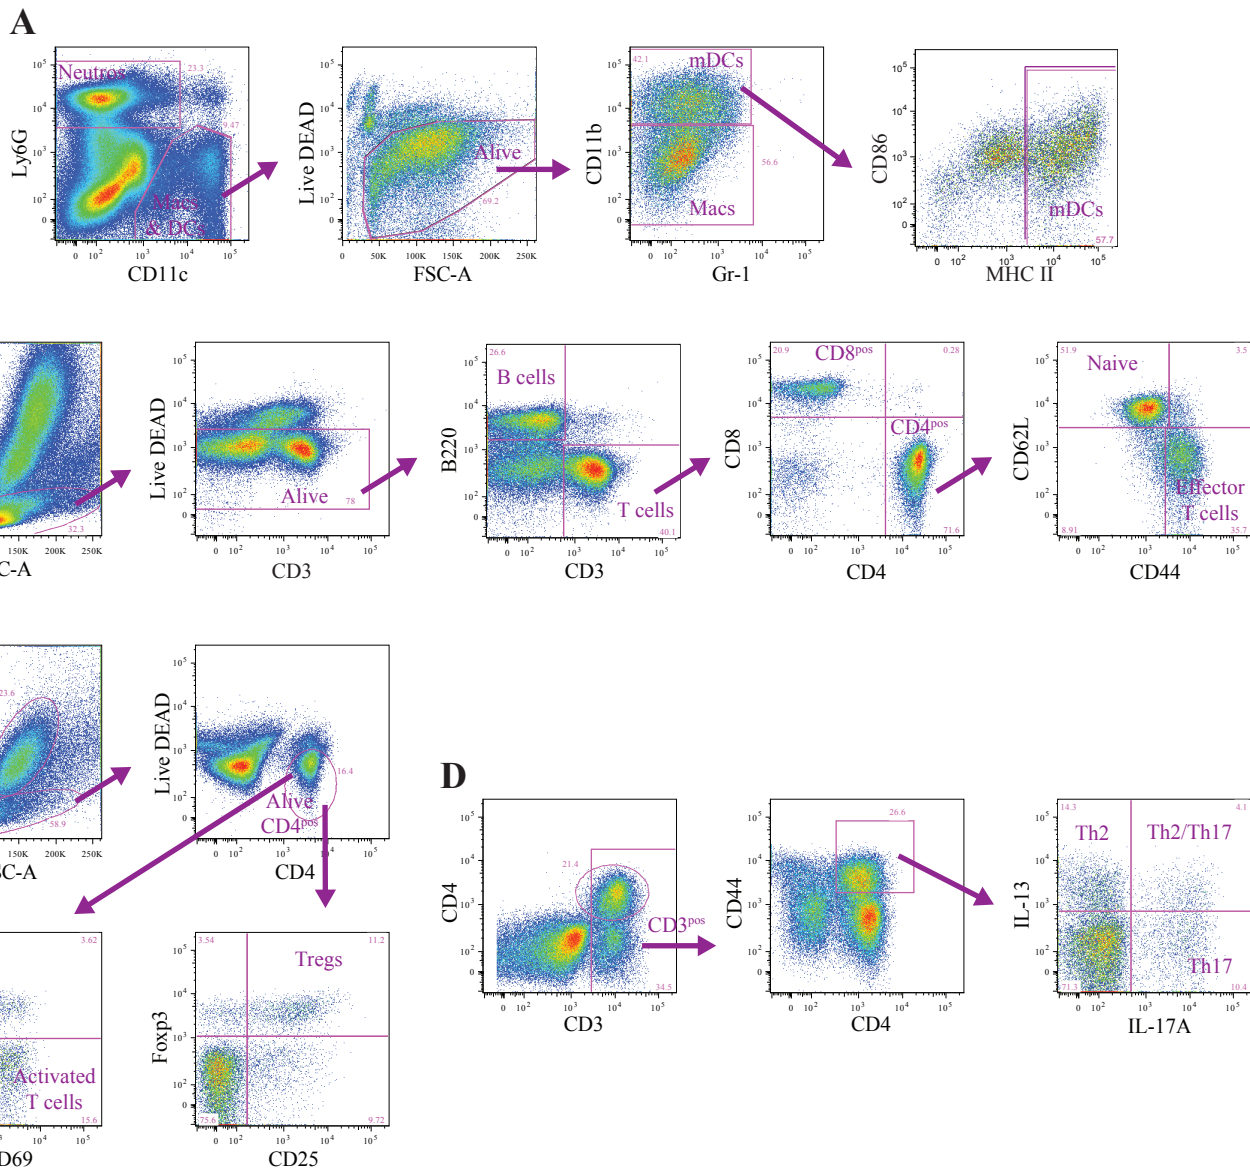

**Supplementary Figure 8. Gating Strategies for FACS analysis.** Depicted are the gating strategies and antibodies used for flow cytometry analysis of lung cells from exposure groups for activated myeloid dendritic cells (A), effector T cells (B), regulatory T cells and activated T cells (C), and intracellular cytokine staining, after ex vivo restimulation, of effector T cells for IL-13, IL-17A, and double positive for IL-13 and IL-17A (D).
